# Supplementary material for: Insights into the vaginal microbiome in a diverse group of women of African, Asian and European ancestries
Source: PubMed Central journal article supplement (PMC9744153; doi:10.7717/peerj.14449), 2022-11-29

Supplementary Figure S1. Correlation plots

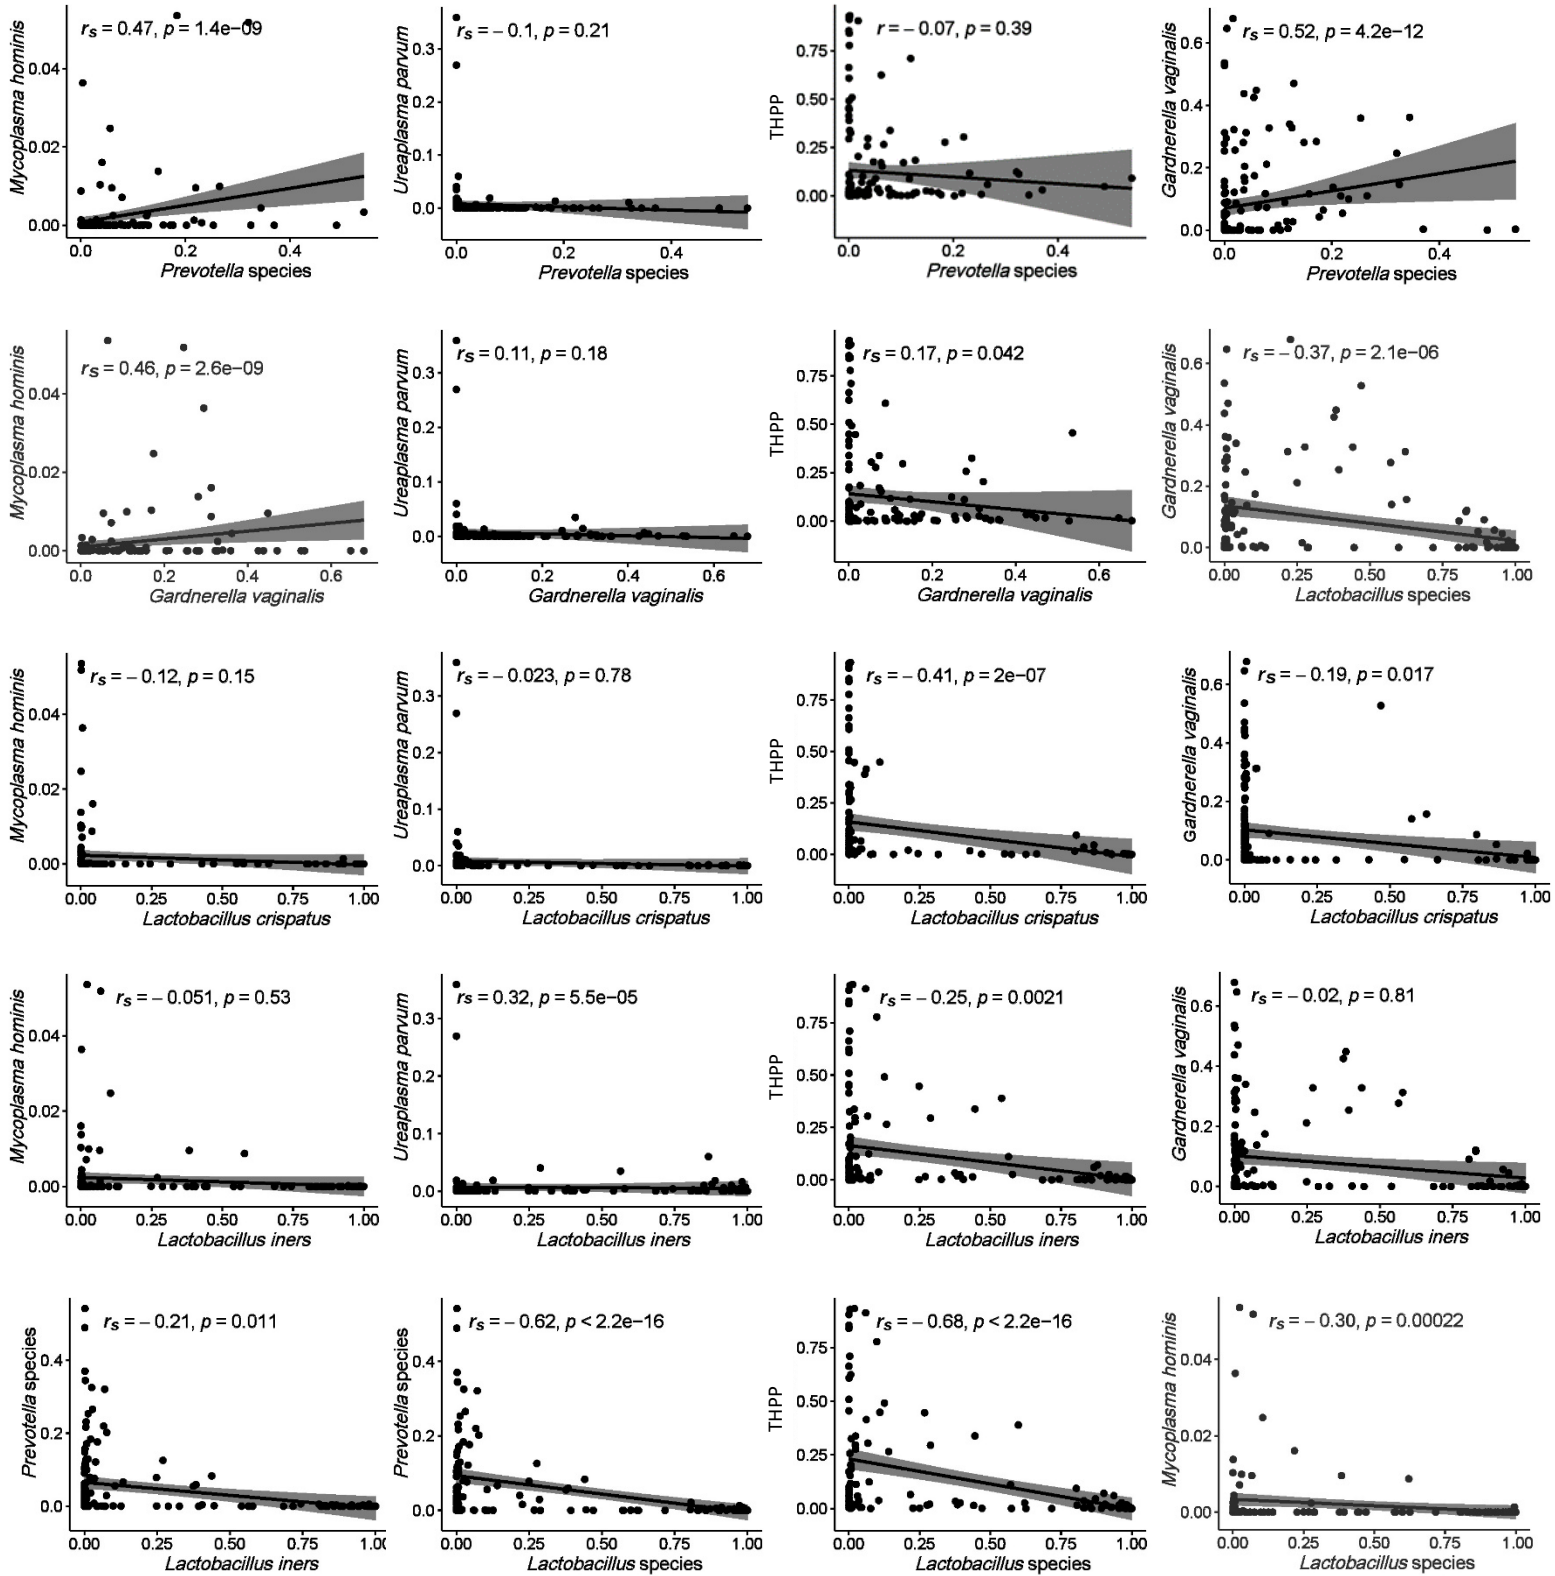

Supplement: peerj-10-14449-s001.pdf [file peerj-10-14449-s001.pdf]
