# Supplementary material for: Insights into the vaginal microbiome in a diverse group of women of African, Asian and European ancestries
Source: PeerJ. 2022 Nov 29;10:e14449. doi: 10.7717/peerj.14449 (PMC9744153; doi:10.7717/peerj.14449)
Supplement: Supplemental Information 2 [file peerj-10-14449-s002.xlsx]

## Sheet: Table 1
Supplementary Table S1. Amplicon sequence characteristics
Sample-id	Input (number of sequences)	Filtered	Input passed filter (%)	Denoised via DADA2	Non-chimeric	Input non-chimeric (%)
Afro-Caribbean (AC)	417364	390210	93.49	388503	355080	85.08
African American (AA)	930045	96203	10.34	95677	91809	9.87
African Kenyan (AK)	1520734	1281176	84.25	1273029	994995	65.43
Asian Indonesian (AI)	3174725	1840538	57.97	1820318	1080047	34.02
Caucasian German (CG)	2484231	2036734	81.99	2032271	1847056	74.35
Total	8527099	5644861	66.2	5609798	4368987	77.88
